# Supplementary material for: Elevated levels of circulating microRNA-200 family members correlate with serous epithelial ovarian cancer
Source: PubMed Central journal article supplement (PMC3542279; doi:10.1186/1471-2407-12-627), 2012-12-28
Supplement: 1471-2407-12-627-S1.pdf [file 1471-2407-12-627-S1.pdf]

**Table S1. Cell lines and cell line typing**

The human SEOC cell line OVCAR-3 was purchased from the American Tissue Culture Collection (Manassas, VA, USA) The PE01 cell line was derived from a poorly differentiated ovarian adenocarcinoma and obtained from Dr. S.P Langdon (Cancer Research UK Centre, University of Edinburgh, Edinburgh, United Kingdom). SEOC cell lines OV167 and OV202; and normal human ovarian surface epithelial (OSE(tsT)) cells were kindly provided by Drs. C. Conover and K. Kalli (Mayo Center, Rochester, MN, USA).

All SEOC cell lines were cultured in RPMI 1640 (Gibco, Life Technologies Australia Pty Ltd, Mulgrave, VIC, Australia) supplemented with 10% (volume/volume) fetal bovine serum (SAFC Bioscience, Brooklyn, VIC, Australia) at 37°C with 5% CO<sub>2</sub>. Cells were grown to 80% confluence prior to harvesting for RNA extraction. The HOSE cell line expresses a temperature sensitive mutant of the SV40 large T-antigen, which enables it to proliferate at 34°C but is inactivated at 39°C. OSE(tsT) was cultured in MCDB 105:Medium 199 (1:1) (Sigma-Aldrich Corporation, Sydney, NSW, Australia) and supplemented with 15% fetal bovine serum (SAFC Bioscience) at 34°C in 5% CO<sub>2</sub>. After plating, cells were allowed to attach for 24 hours at 34°C before incubating at 39°C in 5% CO<sub>2</sub> for 72 hours prior to RNA extraction.

Cell typing was performed by The Lady Fairfax CellBank Australia (Westmead NSW 2145, Australia) using the AmpFI STR Identifiler PCR Amplification Kit (Applied Biosystems), a 16 loci (15 STR loci plus Amelogenin) STR multiplex kit. OVCAR-3 was correctly identified. To our knowledge, profiles for OSE(tsT), OV167, OV202 and PE01 have not previously been available.

| No.                | 1        | 2      | 3       | 4      |
|--------------------|----------|--------|---------|--------|
| <b>Sample Name</b> | OSE(tsT) | OV167  | OV202   | PE01   |
| <b>Sample ID</b>   | 10-375   | 10-376 | 10-377  | 10-378 |
| <b>D8S1179</b>     | 11,16    | 10,12  | 8,11    | 13,14  |
| <b>D21S11</b>      | 28,29    | 30,2   | 28,32,2 | 32,2   |
| <b>D7S820</b>      | 10       | 9,10   | 8,9     | 10     |
| <b>CSF1PO</b>      | 10,12    | 12     | 9,10    | 10,12  |
| <b>D3S1358</b>     | 17,18    | 16     | 17,18   | 16     |
| <b>TH01</b>        | 6,7      | 8      | 9,9,3   | 9,3    |
| <b>D13S317</b>     | 11,15    | 12     | 11      | 10     |
| <b>D16S539</b>     | 9,13     | 10     | 9,11    | 9      |
| <b>D2S1338</b>     | 18,23    | 17     | 17,18   | 20,21  |
| <b>D19S433</b>     | 15       | 12,15  | 13      | 13,15  |
| <b>vWA</b>         | 14,18    | 15,18  | 16,18   | 15,16  |
| <b>TPOX</b>        | 8,12     | 9      | 8,9     | 9,11   |
| <b>D18S51</b>      | 14,18    | 19     | 12      | 16,17  |
| <b>Amel</b>        | X        | X      | X       | X      |
| <b>D5S818</b>      | 11,12    | 11     | 11,13   | 11,12  |
| <b>FGA</b>         | 21,23    | 21     | 21,22   | 20     |

**Table S2. Table of differentially expressed miRNAs with at least 2-fold change (absolute log<sub>2</sub> fold change) in at least 1 of 4 cell lines relative to OSE(tsT). miRNAs assessed as serum biomarkers are highlighted in yellow.**

| Name                | [OV167] vs [OSE(tsT)] |            | [OV202] vs [OSE(tsT)] |            | [OVCAR3] vs [OSE(tsT)] |            | [PEO1] vs [OSE(tsT)] |            |
|---------------------|-----------------------|------------|-----------------------|------------|------------------------|------------|----------------------|------------|
|                     | Absolute Fold Change  | Regulation | Absolute Fold Change  | Regulation | Absolute Fold Change   | Regulation | Absolute Fold Change | Regulation |
| hsa-miR-1425p       | 1.9487                | down       | 2.7654                | up         | 1.4464                 | down       | 1.0886               | up         |
| hsa-miR-124a        | 2.7289                | up         | 1.0377                | up         | 2.5432                 | down       | 3.5044               | down       |
| hsa-miR-522         | 3.0755                | up         | 1.2687                | up         | 12.3877                | up         | 2.3027               | up         |
| hsa-miR-215         | 2.0922                | down       | 1.5610                | down       | 2.0000                 | down       | 1.1368               | down       |
| hsa-miR-143         | 1.5911                | down       | 12.9287               | up         | 1.1427                 | down       | 1.6906               | down       |
| hsa-miR-199a*       | 6.6962                | down       | 1.2842                | down       | 1.2976                 | down       | 3.4422               | down       |
| hsa-miR-521         | 1.1540                | up         | 1.6208                | up         | 18.7221                | up         | 3.4204               | up         |
| hsa-miR-126         | 9.4370                | down       | 1.4431                | up         | 2.5521                 | up         | 2.1226               | down       |
| hsa-miR-141         | 20.1587               | up         | 1.3787                | up         | 2.9862                 | up         | 21.6431              | up         |
| hsa-miR-223         | 2.2166                | down       | 1.2577                | down       | 1.6142                 | down       | 1.3835               | down       |
| <b>hsa-miR-200b</b> | <b>36.8221</b>        | <b>up</b>  | <b>5.1874</b>         | <b>up</b>  | <b>15.4818</b>         | <b>up</b>  | <b>28.2465</b>       | <b>up</b>  |
| hsa-miR-133a133b    | 3.3694                | down       | 1.8596                | up         | 1.0792                 | up         | 1.1996               | down       |
| hsa-miR-422b        | 10.6726               | up         | 3.0755                | up         | 7.3022                 | up         | 3.4422               | up         |
| hsa-miR-5123p       | 4.1101                | down       | 2.0837                | down       | 1.5984                 | down       | 3.0720               | down       |
| <b>hsa-miR-200a</b> | <b>28.9736</b>        | <b>up</b>  | <b>2.3443</b>         | <b>up</b>  | <b>8.2344</b>          | <b>up</b>  | <b>36.4202</b>       | <b>up</b>  |
| hsa-miR-26a         | 1.2219                | down       | 1.5201                | down       | 1.1264                 | down       | 5.7292               | up         |
| hsa-miR-451         | 2.1798                | down       | 1.1796                | up         | 1.4085                 | down       | 2.5832               | down       |
| hsa-miR-663         | 1.2058                | up         | 3.4343                | up         | 3.7646                 | up         | 4.6107               | up         |
| hsa-miR-519b        | 2.8563                | down       | 1.0222                | down       | 1.5351                 | up         | 3.1311               | down       |
| hsa-miR-195         | 2.6421                | down       | 1.7211                | up         | 1.1837                 | up         | 1.1375               | up         |
| hsa-miR-363         | 2.7116                | up         | 1.2177                | up         | 1.1600                 | up         | 1.1540               | up         |
| hsa-miR-637         | 1.2812                | down       | 1.4641                | up         | 2.4666                 | up         | 1.0570               | down       |
| hsa-miR-122a        | 1.0070                | up         | 1.5883                | up         | 2.8679                 | down       | 2.1697               | down       |
| hsa-miR-519a        | 4.5237                | down       | 1.8119                | down       | 3.9109                 | up         | 1.1348               | up         |
| hsa-miR-205         | 1.1500                | down       | 1.4914                | down       | 3.6322                 | up         | 51.9242              | up         |
| hsa-miR-519e        | 1.0443                | down       | 2.2934                | up         | 1.4515                 | up         | 1.0792               | up         |
| <b>hsa-miR-200c</b> | <b>26.3549</b>        | <b>up</b>  | <b>3.0738</b>         | <b>up</b>  | <b>21.7433</b>         | <b>up</b>  | <b>30.0647</b>       | <b>up</b>  |
| hsa-miR-30b         | 1.0736                | down       | 1.1567                | up         | 1.3779                 | down       | 4.2281               | up         |
| hsa-miR-548c        | 4.5525                | down       | 2.7590                | down       | 1.6349                 | down       | 1.1205               | down       |
| hsa-miR-1423p       | 17.0890               | down       | 5.5790                | down       | 2.3743                 | down       | 3.0157               | down       |
| hsa-miR-30d         | 1.6254                | down       | 1.5902                | up         | 1.1722                 | up         | 2.5476               | up         |
| hsa-miR-20b         | 2.2671                | up         | 1.0163                | up         | 1.0528                 | down       | 1.7004               | up         |
| hsa-miR-30a5p       | 15.2334               | up         | 1.5219                | down       | 1.2276                 | down       | 3.1858               | up         |
| hsa-miR-3693p       | 2.3497                | up         | 1.3660                | up         | 1.4464                 | up         | 2.2076               | up         |
| hsa-miR-26b         | 2.4033                | down       | 2.7179                | down       | 1.8564                 | down       | 1.3660               | down       |
| hsa-miR-9           | 4.0255                | down       | 6.9604                | down       | 2.1019                 | down       | 3.7235               | down       |
| hsa-miR-30e3p       | 1.7787                | up         | 1.4573                | up         | 2.6867                 | up         | 2.1597               | up         |
| hsa-miR-34c         | 1.9130                | up         | 1.8192                | up         | 4.2110                 | down       | 1.1375               | up         |
| hsa-let-7c          | 3.2735                | down       | 1.6198                | down       | 1.5520                 | up         | 2.0444               | up         |
| hsa-miR-140         | 4.7596                | down       | 1.2534                | down       | 1.7787                 | down       | 2.4340               | down       |
| hsa-miR-146b        | 1.7401                | down       | 2.4228                | down       | 3.0088                 | down       | 1.0638               | down       |
| hsa-miR-145         | 1.1996                | down       | 2.3094                | up         | 1.7994                 | down       | 1.5131               | up         |
| hsa-miR-603         | 1.4061                | down       | 2.1672                | up         | 1.0128                 | up         | 1.1166               | down       |
| hsa-miR-30c         | 3.4903                | up         | 1.3645                | up         | 1.1755                 | up         | 1.1179               | up         |
| hsa-miR-5153p       | 9.4479                | down       | 2.0209                | down       | 9.0317                 | down       | 12.5316              | down       |
| hsa-miR-455         | 1.3165                | down       | 2.2064                | down       | 1.6096                 | down       | 2.5213               | down       |
| hsa-miR-429         | 7.1934                | up         | 2.4214                | down       | 1.6925                 | up         | 3.3154               | up         |
| hsa-miR-199b        | 1.1335                | down       | 5.9107                | down       | 1.8067                 | down       | 2.5997               | down       |
| hsa-miR-1           | 5.5758                | down       | 2.5476                | down       | 1.0631                 | up         | 2.9983               | down       |
| hsa-miR-449b        | 1.2212                | down       | 2.3147                | down       | 1.5360                 | up         | 1.3387               | down       |
| hsa-miR-539         | 2.5228                | down       | 2.5491                | down       | 1.4340                 | down       | 1.5692               | down       |
| hsa-miR-10b         | 3.7886                | down       | 1.4726                | up         | 1.6634                 | down       | 3.1914               | down       |
| hsa-let-7b          | 5.8869                | down       | 1.1647                | down       | 3.2154                 | down       | 2.5535               | up         |

|                    |               |           |               |           |               |           |               |           |
|--------------------|---------------|-----------|---------------|-----------|---------------|-----------|---------------|-----------|
| hsa-miR-29c        | 1.6692        | down      | 4.7541        | down      | 8.4220        | down      | 1.1362        | down      |
| hsa-miR-138        | 2.4214        | down      | 1.1926        | up        | 1.2390        | up        | 1.0743        | down      |
| hsa-miR-197        | 3.0018        | up        | 2.1116        | up        | 1.4854        | up        | 2.5242        | up        |
| hsa-miR-208        | 1.2184        | up        | 1.6876        | down      | 1.3708        | down      | 2.0069        | down      |
| hsa-miR-519c       | 1.5342        | down      | 1.1851        | down      | 2.2697        | down      | 1.0849        | down      |
| hsa-miR-20a        | 1.7705        | up        | 1.0946        | up        | 1.0622        | down      | 4.3633        | up        |
| hsa-miR-671        | 1.2447        | up        | 2.1006        | up        | 2.1899        | up        | 1.4126        | up        |
| hsa-miR-449        | 1.8067        | down      | 2.4298        | down      | 1.4077        | down      | 1.5701        | down      |
| hsa-miR-199a       | 6.0175        | down      | 6.9483        | down      | 4.6321        | down      | 4.0465        | down      |
| hsa-miR-551b       | 1.6405        | down      | 1.6339        | up        | 1.2534        | up        | 3.7343        | up        |
| hsa-miR-5165p      | 1.5701        | up        | 3.7278        | up        | 1.4624        | up        | 1.5113        | up        |
| hsa_SNORD118       | 2.4144        | up        | 1.3142        | up        | 1.3867        | up        | 1.6320        | up        |
| hsa-miR-526b       | 1.2290        | up        | 3.4046        | up        | 2.0634        | up        | 1.1933        | up        |
| hsa-miR-651        | 1.3021        | down      | 1.4423        | down      | 1.2886        | down      | 2.2397        | down      |
| hsa-miR-518e       | 1.0736        | down      | 2.5982        | down      | 1.2548        | down      | 1.1427        | down      |
| hsa-miR-484        | 1.4666        | up        | 1.7715        | up        | 1.6702        | up        | 2.0669        | up        |
| hsa-miR-335        | 1.5351        | down      | 1.8478        | down      | 2.6087        | down      | 1.6254        | down      |
| <b>hsa-miR-182</b> | <b>6.6461</b> | <b>up</b> | <b>1.8823</b> | <b>up</b> | <b>2.7416</b> | <b>up</b> | <b>6.2550</b> | <b>up</b> |
| hsa-miR-338        | 3.7646        | down      | 3.9862        | down      | 1.5052        | down      | 2.4453        | down      |
| hsa-miR-24         | 1.0693        | down      | 4.9818        | down      | 2.0023        | down      | 1.3597        | up        |
| hsa-miR-509        | 1.8780        | down      | 1.7552        | down      | 1.1381        | down      | 3.2359        | down      |
| hsa-miR-125a       | 3.0455        | down      | 1.0041        | up        | 1.8171        | down      | 2.8962        | down      |
| hsa-miR-95         | 3.7974        | down      | 3.1492        | down      | 1.9827        | down      | 3.1221        | down      |
| hsa-miR-99a        | 2.1597        | down      | 1.1160        | down      | 1.9611        | up        | 4.8010        | down      |
| hsa-miR-30e5p      | 1.1342        | down      | 1.5929        | down      | 2.1987        | down      | 1.5601        | down      |
| hsa-miR-96         | 5.1367        | up        | 1.6740        | up        | 3.1675        | up        | 3.8194        | up        |
| hsa-miR-175p106a   | 1.5166        | up        | 1.1681        | down      | 1.0163        | up        | 3.5329        | up        |
| hsa-miR-152        | 2.1949        | down      | 6.6422        | down      | 1.8943        | down      | 1.9408        | down      |
| hsa-miR-135b       | 7.3700        | up        | 1.1083        | down      | 1.5387        | up        | 2.2410        | up        |
| hsa-miR-379        | 1.2541        | down      | 3.1969        | down      | 1.4456        | down      | 1.4012        | down      |
| hsa-miR-194        | 2.1873        | down      | 2.6512        | down      | 1.8812        | down      | 1.7674        | down      |
| hsa-miR-410        | 2.3770        | down      | 1.9577        | down      | 2.0729        | down      | 2.8366        | down      |
| hsa-miR-16         | 1.3621        | up        | 2.1798        | down      | 1.2687        | up        | 1.7849        | up        |
| hsa-miR-18b        | 1.9086        | up        | 1.5210        | up        | 1.5637        | up        | 3.9655        | up        |
| hsa-miR-578        | 2.2921        | down      | 1.5280        | down      | 1.7828        | down      | 1.4232        | down      |
| hsa-miR-98         | 1.1920        | down      | 2.4340        | down      | 1.2886        | down      | 1.1225        | up        |
| hsa-miR-18a        | 3.3772        | up        | 1.7482        | up        | 1.5619        | up        | 5.8801        | up        |
| hsa-miR-376a       | 6.1974        | down      | 5.5854        | down      | 8.5841        | down      | 14.0907       | down      |
| hsa-miR-29a        | 1.1634        | up        | 6.5508        | down      | 22.6536       | down      | 1.2404        | up        |
| hsa-let-7d         | 1.2233        | down      | 3.2622        | down      | 1.5351        | down      | 1.1494        | down      |
| hsa-miR-33         | 1.2135        | up        | 1.2753        | down      | 2.2671        | down      | 1.1776        | down      |
| hsa-let-7g         | 1.2827        | down      | 3.2024        | down      | 1.6519        | down      | 1.4431        | down      |
| hsa-miR-99b        | 1.7013        | down      | 1.0540        | up        | 1.1961        | up        | 2.1911        | down      |
| hsa-miR-514        | 5.4076        | down      | 3.9724        | down      | 3.3346        | down      | 1.9285        | down      |
| hsa-miR-525*524    | 1.9397        | down      | 2.3308        | down      | 1.2233        | down      | 1.1460        | up        |
| hsa-miR-518f       | 1.6896        | down      | 2.2842        | down      | 1.2519        | down      | 1.0975        | down      |
| hsa-miR-218        | 1.3203        | up        | 1.2665        | up        | 1.2128        | up        | 2.5068        | up        |
| hsa-miR-653        | 2.1861        | down      | 1.4298        | down      | 1.0780        | down      | 1.0081        | up        |
| hsa-miR-384        | 2.0562        | down      | 2.0035        | down      | 1.6358        | down      | 2.2076        | down      |
| hsa-miR-4255p      | 1.2368        | up        | 1.5219        | down      | 2.0058        | up        | 1.0509        | up        |
| hsa-miR-9*         | 1.1045        | down      | 7.3785        | down      | 1.3249        | down      | 1.8932        | down      |
| hsa-miR-626        | 1.4557        | up        | 1.4582        | up        | 2.5388        | up        | 1.1940        | down      |
| hsa-miR-23a        | 1.1057        | down      | 9.0945        | down      | 1.9053        | down      | 1.6386        | up        |
| hsa-miR-27a        | 1.1540        | down      | 2.8268        | down      | 1.1303        | down      | 2.1672        | up        |
| hsa-miR-15b        | 1.5035        | up        | 1.4632        | down      | 2.3147        | up        | 1.3457        | up        |
| hsa-miR-200a*      | 1.0780        | up        | 1.3187        | down      | 2.4780        | down      | 1.1109        | down      |
| hsa-miR-411        | 1.5404        | down      | 1.8769        | down      | 1.2842        | down      | 2.4467        | down      |
| hsa-miR-25         | 2.0729        | down      | 2.1386        | down      | 1.3939        | down      | 1.4557        | down      |
| hsa-miR-22         | 2.3743        | down      | 2.2038        | down      | 9.1419        | down      | 2.6759        | down      |
| hsa_SNORD6         | 2.7992        | up        | 1.1427        | up        | 1.0192        | up        | 1.8213        | up        |
| hsa-miR-148b       | 1.0668        | up        | 1.3134        | up        | 2.7195        | up        | 1.0674        | down      |

|               |         |      |         |      |         |      |         |      |
|---------------|---------|------|---------|------|---------|------|---------|------|
| hsa-miR-526b* | 1.7201  | down | 3.0262  | down | 1.5746  | down | 1.2592  | down |
| hsa-miR-591   | 3.1329  | down | 2.8629  | down | 2.3014  | down | 3.3173  | down |
| hsa-miR-496   | 1.3891  | down | 1.0269  | up   | 1.3210  | down | 2.3936  | down |
| hsa-miR-182*  | 1.3496  | down | 1.6673  | down | 1.7171  | down | 2.9949  | up   |
| hsa-miR-567   | 1.9600  | up   | 1.3203  | up   | 2.0397  | up   | 1.0521  | up   |
| hsa-miR-557   | 1.0041  | down | 1.7391  | down | 1.7756  | down | 2.1226  | down |
| hsa-miR-29b   | 1.8921  | down | 3.8571  | down | 2.3134  | down | 1.2702  | up   |
| hsa-let-7i    | 2.4694  | down | 8.6438  | down | 6.2297  | down | 1.3883  | up   |
| hsa-miR-106b  | 2.0527  | up   | 1.4692  | down | 1.2724  | down | 2.0314  | up   |
| hsa-miR-518d  | 1.4666  | down | 1.7321  | down | 2.1697  | down | 1.6558  | down |
| hsa-miR-19a   | 1.2469  | down | 1.7092  | down | 1.1375  | down | 2.3120  | up   |
| hsa-miR-325   | 1.7112  | down | 1.6964  | down | 2.3295  | down | 2.0634  | down |
| hsa-miR-569   | 1.4473  | down | 1.9839  | down | 2.1522  | down | 1.1089  | up   |
| hsa-miR-553   | 2.6223  | down | 2.1411  | down | 1.7181  | down | 1.6396  | down |
| hsa-miR-576   | 2.3525  | down | 1.4061  | down | 1.3418  | down | 1.3629  | down |
| hsa-miR-376b  | 2.0373  | down | 8.1775  | down | 1.5175  | down | 6.1653  | down |
| hsa-miR-193b  | 1.5467  | down | 1.0093  | up   | 1.0786  | down | 3.9267  | up   |
| hsa-miR-137   | 2.2359  | down | 1.0558  | down | 1.2909  | down | 1.4828  | down |
| hsa-miR-92b   | 1.4862  | down | 1.3716  | up   | 1.3295  | up   | 2.0837  | down |
| hsa_SNORD14B  | 1.8704  | up   | 2.8596  | up   | 1.9031  | up   | 1.8671  | up   |
| hsa-miR-487b  | 1.3716  | down | 1.2961  | up   | 2.5418  | down | 1.8161  | down |
| hsa-miR-301   | 8.1023  | up   | 1.2886  | up   | 1.4012  | down | 1.1837  | up   |
| hsa-miR-125b  | 9.0005  | down | 1.6189  | down | 2.4837  | down | 3.1711  | down |
| hsa-miR-645   | 2.3647  | down | 1.2347  | down | 1.1989  | down | 1.0930  | up   |
| hsa-miR-614   | 1.7736  | up   | 2.0765  | up   | 1.0329  | up   | 1.0749  | up   |
| hsa-miR-136   | 1.4398  | down | 2.0898  | down | 1.0564  | up   | 1.3550  | down |
| hsa-miR-374   | 1.1335  | up   | 2.2256  | down | 1.3931  | up   | 1.7072  | down |
| hsa-miR-330   | 1.1096  | up   | 2.5758  | up   | 1.1547  | down | 1.1115  | up   |
| hsa-miR-656   | 1.3036  | down | 1.4439  | down | 1.2991  | down | 2.4880  | down |
| hsa-miR-2993p | 1.1507  | up   | 1.4241  | down | 3.0053  | down | 3.4641  | down |
| hsa-miR-616   | 2.8399  | up   | 2.0397  | up   | 1.1920  | up   | 1.5219  | up   |
| hsa-miR-4935p | 1.0012  | up   | 1.6003  | down | 2.0012  | down | 1.9942  | down |
| hsa-let-7a    | 3.2546  | down | 7.5292  | down | 4.7568  | down | 1.0407  | up   |
| hsa-miR-4253p | 1.3496  | down | 1.7471  | down | 1.4489  | down | 2.7226  | down |
| hsa_SNORD13   | 2.5418  | up   | 3.4244  | up   | 3.7149  | up   | 1.3134  | up   |
| hsa-miR-607   | 2.3134  | up   | 1.1290  | up   | 1.5583  | up   | 1.2397  | up   |
| hsa-miR-605   | 1.6837  | down | 2.0729  | down | 1.1166  | down | 1.0222  | down |
| hsa-miR-34a   | 4.1030  | down | 14.8168 | down | 3.5288  | down | 11.0553 | down |
| hsa-miR-431   | 2.9299  | down | 4.7678  | down | 3.0862  | down | 3.4903  | down |
| hsa-miR-339   | 1.4607  | down | 2.2566  | down | 1.9241  | down | 1.6984  | down |
| hsa-miR-100   | 35.4447 | down | 13.3152 | down | 12.7286 | down | 3.4702  | down |
| hsa-let-7f    | 1.5538  | down | 2.0221  | down | 1.6510  | down | 1.9431  | down |
| hsa-miR-368   | 2.0669  | down | 1.8308  | down | 1.1076  | up   | 1.5828  | down |
| hsa-miR-5155p | 9.3125  | down | 7.6564  | down | 2.7023  | down | 6.0384  | down |
| hsa-miR-3805p | 3.4641  | down | 2.8235  | down | 1.3875  | down | 2.6117  | down |
| hsa-miR-130a  | 4.7541  | up   | 1.1006  | down | 1.1121  | down | 1.1968  | up   |
| hsa-miR-520d* | 2.0813  | down | 1.8150  | down | 1.1487  | down | 1.3827  | down |
| hsa-miR-383   | 1.1892  | down | 2.2307  | down | 1.7053  | down | 1.3149  | down |
| hsa-miR-184   | 1.3732  | up   | 1.7623  | up   | 2.1031  | up   | 1.6994  | up   |
| hsa-miR-432   | 1.4794  | down | 2.2307  | down | 2.8186  | down | 1.7994  | down |
| hsa-miR-583   | 1.0718  | down | 2.1140  | up   | 1.4167  | up   | 1.4489  | up   |
| hsa-miR-639   | 1.3511  | down | 2.1873  | down | 1.4992  | down | 1.8203  | down |
| hsa-miR-582   | 1.7880  | down | 1.9600  | down | 2.1043  | down | 2.8008  | down |
| hsa-miR-452*  | 1.0455  | up   | 2.4425  | down | 1.3226  | down | 1.1032  | up   |
| hsa-miR-127   | 1.3028  | down | 2.3812  | down | 2.8121  | down | 2.9673  | down |
| hsa-miR-217   | 2.3688  | up   | 1.2894  | up   | 1.4012  | up   | 1.5096  | up   |
| hsa-miR-151   | 2.6681  | down | 3.4184  | down | 1.2842  | down | 1.6828  | down |
| hsa-miR-155   | 4.5868  | down | 4.2649  | down | 5.0020  | down | 2.3014  | down |
| hsa-miR-193a  | 1.7291  | down | 5.2780  | down | 5.2598  | down | 1.1368  | down |
| hsa-miR-559   | 2.1055  | down | 1.2961  | down | 1.8521  | down | 1.6984  | down |
| hsa-miR-622   | 1.5263  | up   | 2.6666  | up   | 2.5580  | up   | 1.5719  | up   |
| hsa-miR-183   | 2.5817  | up   | 2.2127  | up   | 3.9541  | up   | 2.6268  | up   |
| hsa-miR-10a   | 1.0956  | down | 2.8073  | down | 7.8308  | down | 1.3441  | down |
| hsa-miR-594   | 2.2894  | up   | 1.3172  | down | 1.0052  | up   | 1.5801  | up   |
| hsa-miR-488   | 1.2135  | down | 1.0064  | down | 1.0329  | down | 2.5565  | down |

|               |        |      |         |      |         |      |         |      |
|---------------|--------|------|---------|------|---------|------|---------|------|
| hsa-miR-587   | 1.8943 | down | 1.0749  | down | 2.0753  | up   | 1.1355  | up   |
| hsa-miR-4093p | 1.8965 | down | 2.1710  | down | 1.1434  | down | 2.4005  | down |
| hsa-miR-378   | 1.4331 | down | 2.8121  | down | 2.3565  | down | 2.4780  | down |
| hsa-miR-21    | 1.2548 | down | 2.7463  | down | 9.2535  | down | 1.6994  | down |
| hsa_SNORD3    | 1.6377 | down | 2.2333  | down | 1.7161  | down | 1.8266  | down |
| hsa_SNORD15A  | 5.9278 | down | 4.6913  | down | 1.6217  | down | 8.8458  | down |
| hsa-miR-222   | 2.6314 | down | 8.5940  | down | 3.8929  | down | 1.2775  | down |
| hsa-miR-370   | 1.1434 | down | 2.5862  | down | 2.0789  | down | 1.9196  | down |
| hsa-miR-221   | 4.2821 | down | 22.6405 | down | 5.8092  | down | 2.7431  | down |
| hsa-miR-146a  | 7.0739 | down | 40.7153 | down | 65.3448 | down | 27.4741 | down |

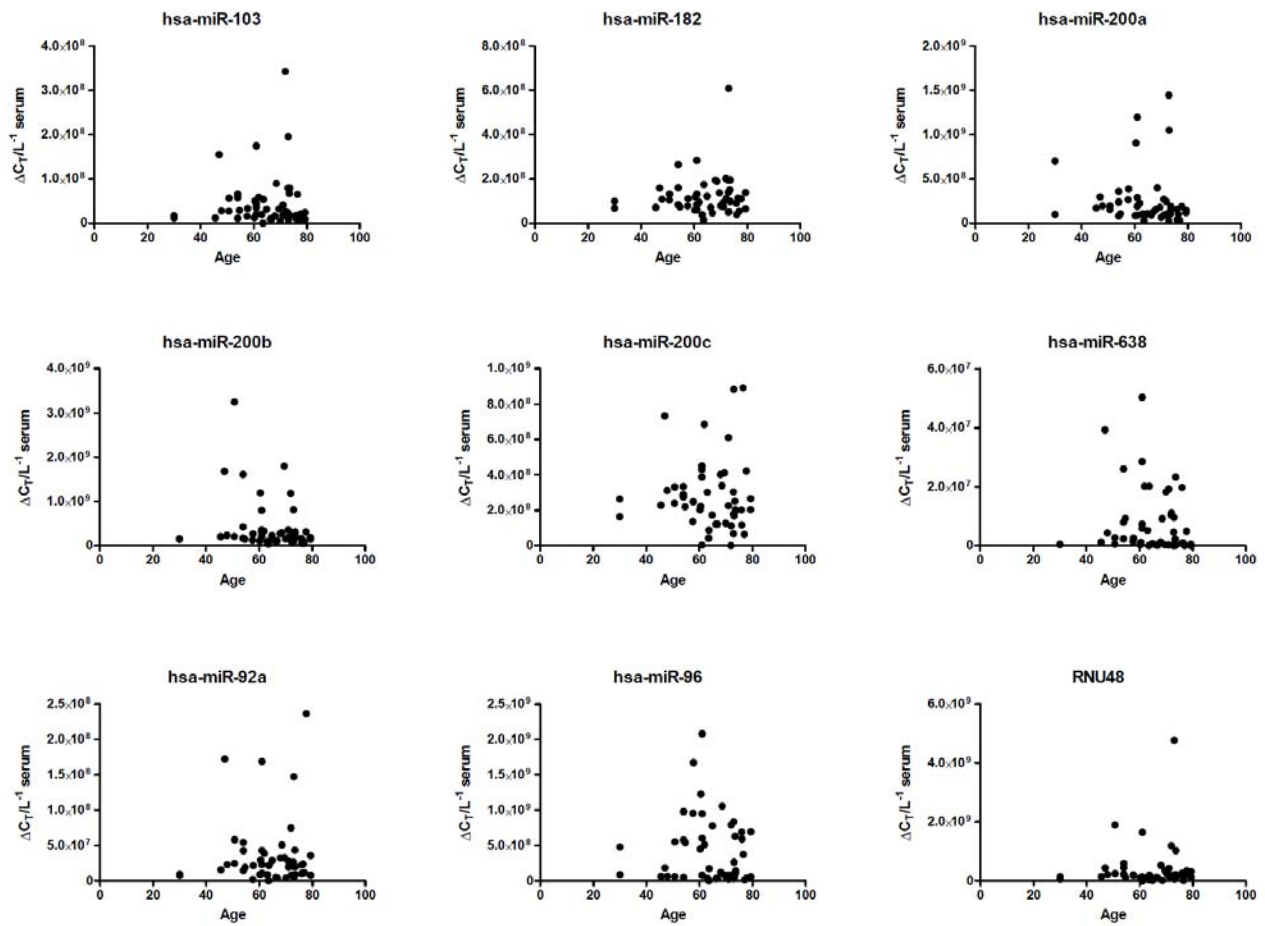

**Figure S1. Serum miRNA levels relative to age**

Volume adjusted values ( $\Delta C_T/L^{-1}$  of serum assayed) are plotted relative to age (N=56).

**Table S3. Pairwise correlation values for serum miRNA levels and CA-125, tumor size, progression free interval or overall survival.** Volume adjusted miRNA values ( $\Delta\Delta C_T/L^{-1}$  of serum assayed) normalized to miR-103 are correlated to pre-operative CA-125 measurements, tumor size (mm) and progression free interval and overall survival (months) (Pearson product-moment correlation coefficient (PCC); 2-tailed).

| miRNA    | CA-125 (N=14) |      | Tumor Size (N=20) |      | Progression Free Interval (N=14) |      | Overall Survival (N=20) |      |
|----------|---------------|------|-------------------|------|----------------------------------|------|-------------------------|------|
|          | PCC           | P    | PCC               | P    | PCC                              | P    | PCC                     | P    |
| miR-92a  | .116          | .692 | .051              | .829 | .061                             | .836 | .087                    | .716 |
| miR-638  | .032          | .913 | .111              | .643 | -.037                            | .901 | .082                    | .730 |
| miR-200a | .247          | .395 | .302              | .196 | .415                             | .140 | .160                    | .500 |
| miR-200b | .120          | .684 | .205              | .386 | .332                             | .247 | .121                    | .738 |
| miR-200c | .215          | .461 | .335              | .148 | .192                             | .511 | .073                    | .760 |
| miR-182  | .068          | .818 | .152              | .523 | .225                             | .439 | -.017                   | .942 |
| miR-96   | .117          | .690 | -.165             | .486 | .001                             | .997 | .115                    | .629 |
| RNU48    | -.042         | .887 | .136              | .568 | .372                             | .191 | .092                    | .700 |
